# Supplementary material
Source: PubMed Central journal article supplement (PMC3754511)
Supplement: CVI.00275-13_zcd999094813so1.pdf [file CVI.00275-13_zcd999094813so1.pdf]

|        |     |                                                                  |     |
|--------|-----|------------------------------------------------------------------|-----|
| Newman | 40  | SENSVTQSDSASNESKSNDSSSVSAAPKTDITNVSDTKTSSNTNNGETSVAQNPAQQETT     | 99  |
| NRS384 | 40  | SENSVTQSDSASNESKSNDSSSVSAAPKTDITNVSDTKTSSNTNNGETSVAQNPAQQETT     | 99  |
| N315   | 40  | SENSVTQSDSASNESKSNDSSSVSAAPKTDITNVSDTKTSSNTNNGETSVAQNPAQQETT     | 99  |
|        |     | *****                                                            |     |
| Newman | 100 | QSSSTNATTEETPVTGEATTTTNQANTPATTQSSNTNAEELVNQTSNETTFNDTNTVSS      | 159 |
| NRS384 | 100 | QSSSTNATTEETPVTGEATTTTNQANTPATTQSSNTNAEELVNQTSNETTSDNTNTVSS      | 159 |
| N315   | 100 | QSSSTNATTEETPVTGEATTTTNQANTPATTQSSNTNAEELVNQTSNETTSDNTNTVSS      | 159 |
|        |     | *****                                                            |     |
| Newman | 160 | VNSPQNSTNAENVSTTQDTS TEATPSNNESAPQSTDASNKDVVNQAVNTSAPRMRAFSLA    | 219 |
| NRS384 | 160 | VNSPQNSTNAENVSTTQDTS TEATPSNNESAPQSTDASNKDVVNQAVNTSAPRMRAFSLA    | 219 |
| N315   | 160 | VNSPQNSTNAENVSTTQDTS TEATPSNNESAPQNTDASNKDVVSQAVNPSTPRMRAFSLA    | 219 |
|        |     | ***** .***** .*** .*:*****                                       |     |
| Newman | 220 | AVAADAPAAGTDITNQLTNVTVGIDSGTTVYPHQAGYVKLNYGFSVPNSAVKGDTFKITY     | 279 |
| NRS384 | 220 | AVAADAPAAGTDITNQLTNVTVGIDSGTTVYPHQAGYVKLNYGFSVPNSAVKGDTFKITY     | 279 |
| N315   | 220 | AVAADAPAAGTDITNQLTDVKVTIDSGTTVYPHQAGYVKLNYGFSVPNSAVKGDTFKITY     | 279 |
|        |     | ***** : * *****                                                  |     |
| Newman | 280 | PKELNLTGVTSTAKVPPIMAGDQVLANGVIDSDGNVIYTFDYVNTKDDVKATLTM PAYI     | 339 |
| NRS384 | 280 | PKELNLTGVTSTAKVPPIMAGDQVLANGVIDSDGNVIYTFDYVNTKDDVKATLTM PAYI     | 339 |
| N315   | 280 | PKELNLTGVTSTAKVPPIMAGDQVLANGVIDSDGNVIYTFDYVDNKENVTANITM PAYI     | 339 |
|        |     | ***** : . * : * . : *****                                        |     |
| Newman | 340 | DPENVKKTGNVTLATGIGSTTANKTVLVDYEKYGKFYNLSIKGTIDQIDKTNNTYRQTIY     | 399 |
| NRS384 | 340 | DPENVKKTGNVTLATGIGSTTANKTVLVDYEKYGKFYNLSIKGTIDQIDKTNNTYRQTIY     | 399 |
| N315   | 340 | DPENVTKTGNVTLTTGIGTNTASKTVLIDYEKYGFHNLSIKGTIDQIDKTNNTYRQTIY      | 399 |
|        |     | ***** .***** :*** : . * . ***** :***** : * .*****                |     |
| Newman | 400 | VNPSGDNVIAPVLTGNLKPNTDSNALIDQQNTSIKVYKVDNAADLSESYFVNPNFEDVT      | 459 |
| NRS384 | 400 | VNPSGDNVIAPVLTGNLKPNTDSNALIDQQNTSIKVYKVDNAADLSESYFVNPNFEDVT      | 459 |
| N315   | 400 | VNPSGDNVVLPALVTGNLIPNTKSNALIDAKNTDIKVYRVDNANDLSESYVNPSPDFEDVT    | 459 |
|        |     | ***** : * .***** *** .***** :** .**** :**** ***** :*** . : ***** |     |
| Newman | 460 | NSVNITFPNPQYKVEFNTDDQITTPYIVVNGHIDPNSKGDALRSTLYGYNLSNI IWR       | 519 |
| NRS384 | 460 | NSVNITFPNPQYKVEFNTDDQITTPYIVVNGHIDPNSKGDALRSTLYGYNLSNI IWR       | 519 |
| N315   | 460 | NQVRISFPNANQYKVEFPTDDQITTPYIVVNGHIDPASTGDALRSTFYGYDSNFIWR        | 519 |
|        |     | * . * . : * * . ***** * ***** * . ***** . * * : * * . * * *      |     |
| Newman | 520 | SMSWDNEVAFNN                                                     | 531 |
| NRS384 | 520 | SMSWDNEVAFNN                                                     | 531 |
| N315   | 520 | SMSWDNEVAFNN                                                     | 531 |
|        |     | *****                                                            |     |

**Figure S1. Amino acid alignment of ClfA<sub>40-531</sub>.** Shown are amino acid sequences for the fibrinogen binding region of ClfA for strains Newman, NRS384, and N315. Newman is used as a surrogate for NRS384 in analyzing the location of amino acid differences with N315 ClfA on the crystal structure of the protein.
